# Supplementary material
Source: PubMed Central journal article supplement (PMC1562475)
Supplement: bmj_333_7567_530__1.pdf [file bmj_333_7567_530__1.pdf]

## Extra references

- w1. Kang JY, Hoare J, Majeed A, Williamson RCN, Maxwell JD. Decline in admission rates for acute appendicitis in England. *Br J Surg* 2003;90:1586-92.
- w2. Beasley SW. Can we improve diagnosis of acute appendicitis? *BMJ* 2000;321:907-8.
- w3. Buschard K, Kjaeldgaard A. Investigation and analysis of the position, fixation, length and embryology of the vermiform appendix. *Acta Chir Scand* 1973;139:293-8.
- w4. Wagner JM, McKinney WP, Carpenter JL. Does this patient have appendicitis? *JAMA* 1996;276:1589-94.
- w5. Alvarado A. A practical score for the early diagnosis of acute appendicitis. *Ann Emerg Med* 1986;15:557-64.
- w6. Paulson EK, Kalady MF, Pappas TN. Suspected appendicitis. *N Engl J Med* 2003;348:236-42.
- w7. Tzanakis N, Efstathiou S, Danulidis K, Rallis G, Tsioulos D, Chatzivasilou A, et al. A new approach to accurate diagnosis of acute appendicitis. *World J Surg* 2005;29:1151-6.
- w8. Birnbaum BA, Wilson SR. Appendicitis at the millennium. *Radiology* 2000;215:337-48.
- w9. Nitta N, Takahashi M, Furukawa A, Murata K, Mori M, Fukushima M. MR imaging of the normal appendix and acute appendicitis. *J Magn Reson Imaging* 2005;21:156-65.
- w10. Rao PM, Rhea JT, Rattner DW, Venus LG, Novelline RA. Introduction of appendiceal CT: impact on negative appendectomy and appendiceal perforation rates. *Ann Surg* 1999;229:344-9.
- w11. Rao PM, Rhea JT, Novelline RA, Mostafavi AA, McCabe CJ. Effect of computed tomography of the appendix on treatment of patients and use of hospital resources. *N Engl J Med* 1998;338:141-6.
- w12. Keyzer C, Tack D, de Maertelaer V, Bohy P, Gevenois PA, Van Gansbeke D. Acute appendicitis: comparison of low-dose and standard-dose unenhanced multi-detector row CT. *Radiology* 2004;232:164-72.
- w13. Green R, Bulloch B, Kabani A, Hancock BJ, Tenenbein M. Early analgesia for children with acute abdominal pain. *Pediatrics* 2005;116:978-83.
- w14. Braveman P, Schaaf VM, Egerter S, Bennett T, Schechter W. Insurance-related differences in the risk of ruptured appendix. *N Engl J Med* 1994;331:444-9.
- w15. Eriksson S, Granstrom L. Randomized controlled trial of appendicectomy versus antibiotic therapy for acute appendicitis. *Br J Surg* 1995;82:166-9.
- w16. Grosfeld JL, Weinberger M, Clatworthy HW Jr. Acute appendicitis in the first two years of life. *J Pediatr Surg* 1973;8:285-93.

- w17. Flum DR, Koepsell T. The clinical and economic correlates of misdiagnosed appendicitis: nationwide analysis. *Arch Surg* 2002;137:799-804.
- w18. Benjamin IS, Patel AG. Managing acute appendicitis. *BMJ* 2002;325:505-6.
- w19. Jones PF. Suspected acute appendicitis: trends in management over 30 years. *Br J Surg* 2001;88:1570-7.
- w20. Ahmed I, Deakin D, Parsons SL. Appendix mass: do we know how to treat it? *Ann R Coll Surg Engl* 2005;87:191-5.
- w21. Mayer EA, Collins SM. Evolving pathophysiologic models of functional gastrointestinal disorders. *Gastroenterology* 2002;122:2032-48.
- w22. Di Sebastiano P, Fink T, di Mola FF, Weihe E, Innocenti P, Friess H, et al. Neuroimmune appendicitis. *Lancet* 1999;354:461.
- w23. Radford-Smith GL, Edwards JE, Purdie DM, Pandeya N, Watson M, Martin NG, et al. Protective role of appendectomy on onset and severity of ulcerative colitis and Crohn's disease. *Gut* 2002;51:808-13.
- w24. Cosnes J, Carbonnel F, Beaugerie L, Blain A, Reijasse D, Gendre JP. Effects of appendectomy on the course of ulcerative colitis. *Gut* 2002;51:803-7.
- w25. Sachar DB. Appendix redux. *Gut* 2002;51:764-5.
